# Supplementary material for: Mild fabrication of silica-silver nanocomposites as active platforms for environmental remediation
Source: Royal Society of Chemistry journal article supplement (doi:10.1039/c4ra14069a), 2015-01-01
Supplement: c4ra14069a1.pdf [file c4ra14069a1.pdf]

## **Mild fabrication of silica-silver nanocomposites as active platforms for environmental remediation**

A. Mignani,<sup>a\*</sup> S. Fazzini,<sup>b</sup> B. Ballarin,<sup>b\*</sup> E. Boanini,<sup>c</sup> M. C. Cassani,<sup>b</sup> C. Maccato,<sup>d</sup> D. Barreca,<sup>e</sup> D.

Nanni<sup>b</sup>

<sup>a</sup> *Center for Industrial Research - Advanced Applications in Mechanical Engineering and Materials Technology (CIRI-MAM), University of Bologna, Viale del Risorgimento, 2 I-40136 Bologna, Italy*

<sup>b</sup> *Department of Industrial Chemistry "Toso Montanari", University of Bologna and INSTM, Viale del Risorgimento, 4 I-40136 Bologna, Italy*

<sup>c</sup> *Department of Chemistry "Giacomo Ciamician", University of Bologna, Via Selmi, 2 I-40126 Bologna, Italy*

<sup>d</sup> *Department of Chemical Sciences, University of Padova and INSTM, Via Marzolo 1, I-35131 Padova, Italy*

<sup>e</sup> *CNR-IENI and INSTM, c/o Department of Chemical Sciences, University of Padova, Via Marzolo 1, I-35131 Padova, Italy*

\*corresponding authors e-mail addresses: [barbara.ballarin@unibo.it](mailto:barbara.ballarin@unibo.it); [a.mignani@unibo.it](mailto:a.mignani@unibo.it) tel.: +390512093704; fax: +390512093690

## SUPPORTING INFORMATION

|                                                                                           |     |
|-------------------------------------------------------------------------------------------|-----|
| <b>1. XRD analysis</b>                                                                    | S4  |
| <b>2. XPS and XE-AES analyses</b>                                                         | S5  |
| <b>3. Methylene Blue (MB) catalysis</b>                                                   | S10 |
| <b>4. UV-Vis spectra of Sunset Yellow (SY) and Azorubine (AZ)</b>                         | S12 |
| <b>5. Catalytic reduction of azo dyes SY and AZ by AgNPs/(SiO<sub>2</sub>-PEI-2)</b>      | S13 |
| <b>6. SEM analysis</b>                                                                    | S14 |
| <b>7. UV-Vis spectra of MB before and after addition of AgNPs/(SiO<sub>2</sub>-PEI-2)</b> | S15 |

## **List of Abbreviations:**

Ag<sub>NPS</sub>: Silver nanoparticles

AZ: Azorubine

BE: binding energy

BET: Brunauer-Emmett-Teller specific surface area analysis by gas adsorption

DLS: dynamic light scattering

FE-SEM: Field Emission-Scanning Electron Microscopy

FWHM: Full Width at Half Maximum

LMB: Leuco Methylene Blue

MB: Methylene blue

NaBH<sub>4</sub>: Sodium Borohydride

NH<sub>4</sub>OH: Ammonia Hydroxide Solution

SiO<sub>2</sub>-PEI: Polyethylenimine-functionalized silica beads

SY: Sunset Yellow

UV-Vis: Ultraviolet–visible spectroscopy

XPS: X-ray Photoelectron

XE-AES: X-ray Excited Auger Electron Spectroscopy

XRD: X-ray Diffraction

XRF: X-ray fluorescence

## 1. XRD analysis

The presence of chlorides (present as impurity) in the commercial SiO<sub>2</sub>-PEI beads causes problems during the AgNPs/SiO<sub>2</sub>-PEI preparation, giving rise to silver chloride precipitation as shown by XRD pattern (see figure S1).

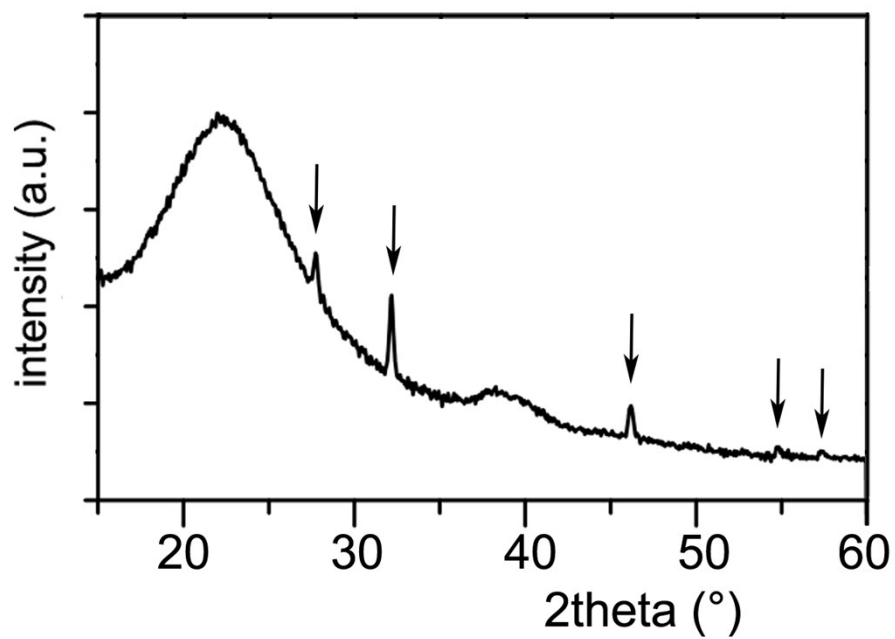

**Fig. S1.** XRD pattern of catalyst samples without pre-treatment in 1.3 M KNO<sub>3</sub>.

## 2. XPS and XE-AES analyses

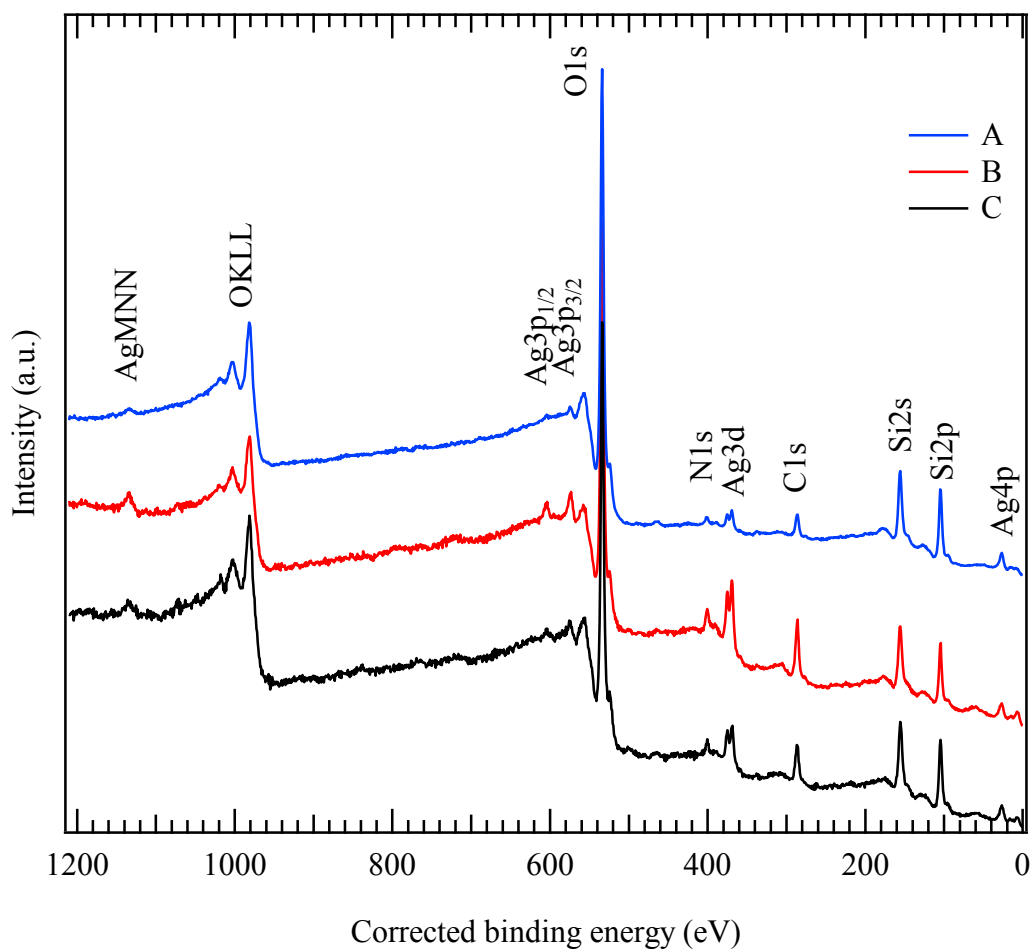

**Fig. S2.** Surface survey spectra of AgNPs/(SiO<sub>2</sub>-PE-2) samples: A) before catalysis; B) after Methylene blue (MB) catalysis and C) after Sunset Yellow (SY) catalysis.

The survey spectra of the analyzed samples (**Fig. S2**) are qualitatively very similar and indicate the presence of carbon, oxygen, silver, silicon and nitrogen. No other elements were detected in appreciable amounts.

**Fig. S3** displays the higher resolution surface C1s, O1s, Ag3d, Si2s, N1s and AgMNN regions, whose analysis allowed a more detailed insight into the sample composition.

Atomic percentage values are reported in **Table S1**.

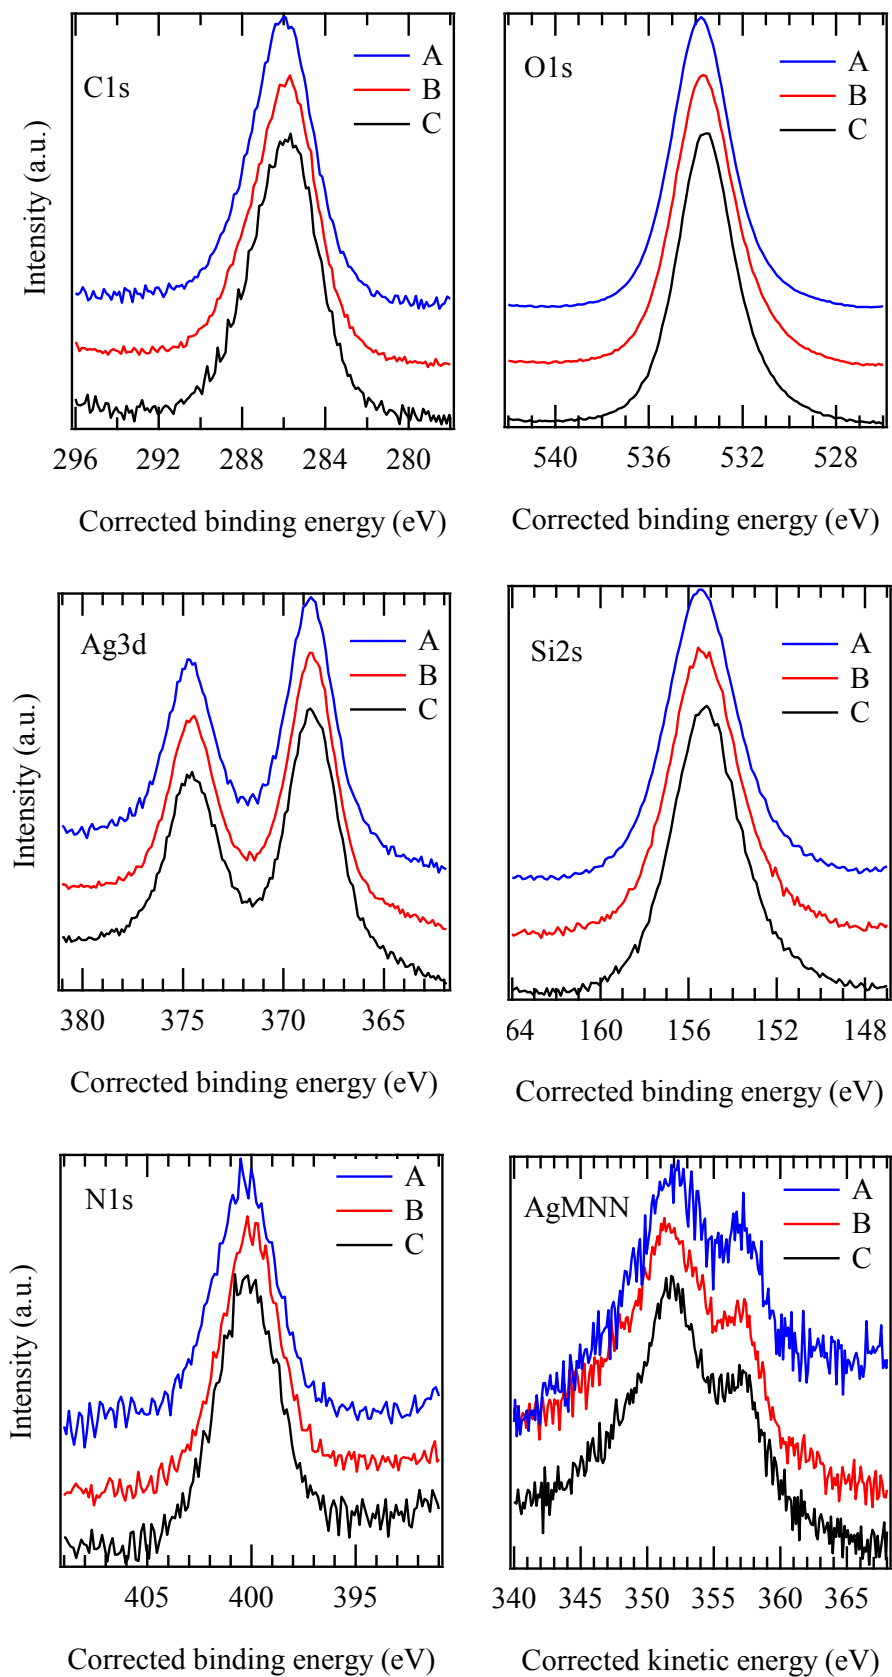

**Fig. S3.** Higher resolution XPS surface signals collected for the analyzed specimens.

**Table S1.** Atomic percentages for AgNPs/(SiO<sub>2</sub>-PEI-2) samples before (A) and after catalysis (B and C). The O/Si and Ag/Si atomic ratios are also provided. The 3 specimens present a rather similar O/Si ratio, but different carbon contents and different Ag/Si ratios.

| <b>A: AgNPs/(SiO<sub>2</sub>-PEI-2)</b><br><b>before catalysis</b> | <b>C</b> | <b>O</b> | <b>Ag</b>    | <b>Si</b> | <b>N</b> |
|--------------------------------------------------------------------|----------|----------|--------------|-----------|----------|
| <b>%</b>                                                           | 9.3      | 61.8     | 0.6          | 26.5      | 1.8      |
| O/Si = 2.3                                                         |          |          | Ag/Si = 0.02 |           |          |

| <b>B: AgNPs/(SiO<sub>2</sub>-PEI-2)</b><br><b>after MB catalysis</b> | <b>C</b> | <b>O</b> | <b>Ag</b>   | <b>Si</b> | <b>N</b> |
|----------------------------------------------------------------------|----------|----------|-------------|-----------|----------|
| <b>%</b>                                                             | 20.8     | 51.6     | 1.9         | 21.1      | 4.5      |
| O/Si = 2.4                                                           |          |          | Ag/Si = 0.1 |           |          |

| <b>C: AgNPs/(SiO<sub>2</sub>-PEI-2)</b><br><b>after SY catalysis</b> | <b>C</b> | <b>O</b> | <b>Ag</b>    | <b>Si</b> | <b>N</b> |
|----------------------------------------------------------------------|----------|----------|--------------|-----------|----------|
| <b>%</b>                                                             | 14.9     | 55.8     | 1.3          | 24.8      | 3.1      |
| O/Si = 2.2                                                           |          |          | Ag/Si = 0.05 |           |          |

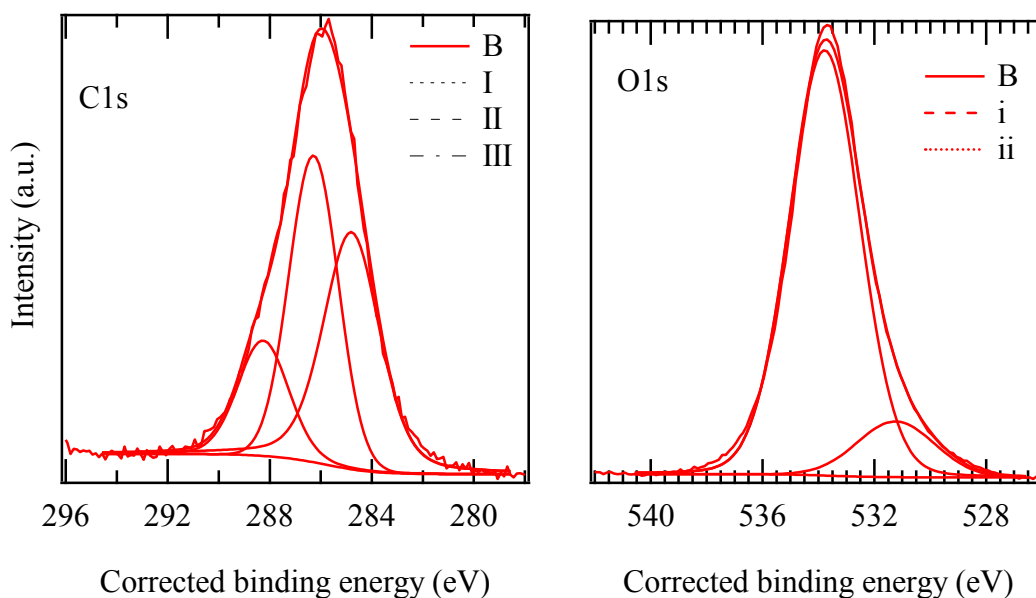

**Fig. S4.** Peak fitting for C1s and O1s signals in the case of sample B: AgNPs/(SiO<sub>2</sub>-PEI-2) after MB catalysis.

A detailed analysis of the peak shape and energy position yielded similar results for A, B and C.

As an example, Fig. S4 displays the curve fitting results for C1s and O1s signals in the case of B: AgNPs/(SiO<sub>2</sub>-PEI-2) after MB catalysis. The C1s photopeak could be decomposed by means of three distinct components: i, located at 284.8 eV [Full Width at Half Maximum (FWHM) = 2.6 eV, 41.8% of the total C amount], related to adventitious carbon, aliphatic residuals in PEI and C-C bonds in MB residuals adsorbed on the system surface [1,2]; ii, located at 286.3 eV (FWHM = 2.3 eV, 41.2% of the total C amount), mainly related to C-N bonds in PEI and in MB residuals adsorbed on the system surface [1]; iii, located at 288.2 eV (FWHM = 2.3 eV, 17.0% of the total C amount), mainly related to carbonate/bicarbonate species arising from atmospheric exposure [4,5].

The O1s peak was fitted by two different bands: i, BE = 533.8 eV (FWHM = 3.0 eV, 87.8% of the total O amount), the majority contributing component, related to silica [1]; ii, BE = 531.2 eV (FWHM = 3.3 eV, 12.2% of the total O amount), related to silver carbonates/bicarbonates, in



accordance with the literature [4,5]. Nevertheless, it is also worth noticing that other species could be responsible for the latter band, including hydroxyl groups and adsorbed O<sub>2</sub> [4]. The presence of these species was responsible for an O/Si atomic ratio slightly higher than that expected for stoichiometric SiO<sub>2</sub> (compare Table S1).

Irrespective of the treatment conditions, the Ag 3d peak was always characterized by a single doublet, with the Ag3d<sub>5/2</sub> component located at 368.5 eV (average FWHM = 2.9 eV), suggesting the presence of metallic silver [6]. Nevertheless, the evaluation of the silver Auger parameters [ $\alpha_1 = \text{BE}(\text{Ag}3d_{5/2}) + \text{KE}(\text{M}_5\text{NN})$ ;  $\alpha_2 = \text{BE}(\text{Ag}3d_{5/2}) + \text{KE}(\text{M}_4\text{NN})$ ] is necessary since the chemical shift of the Ag3d peak alone does not allow an unambiguous distinction among the various Ag chemical states [2-4,7]. In the present case, the calculation yielded the following average values:  $\alpha_1 = 720.2$  eV;  $\alpha_2 = 725.6$  eV, intermediate values between those expected for Ag(0) and Ag(I) [5,8,9]. This result agrees with the minority presence of oxidized Ag species, such as carbonate-related ones, in accordance with C1s spectral features (see above). A reliable quantitative evaluation of the relative Ag(0) and Ag(I) amounts by Ag 3d peak deconvolution is prevented by the very close BEs for the two oxidation states [2].

For a more accurate quantification of the relative Ag/Si content, the Si2s signal was recorded instead of the Si2p one [5]. The Si 2s features (average BE = 155.3 eV; average FWHM = 3.8 eV) were in agreement with SiO<sub>2</sub> presence [1].

The interpretation of the increase in the Ag/Si ratio after catalytic experiments can be performed by taking into account the FE-SEM images (see Fig. S8), that display an increase in the Ag-containing particle size from 9 to 19 nm after catalytic tests. This size variation could be traced back to a re-organization of silver particle distribution in the target materials, and, in particular, to segregation phenomena of Ag-based NPs in the outermost system layers after catalysis. The occurrence of such a process could explain both the increase in silver NP size and the higher Ag/Si ratio determined by

XPS analyses after catalytic tests.

The N1s peak (average BE = 400.2 eV, average FWHM = 3.3 eV) was in agreement with the presence of C-N moieties in PEI [1].

### 3 Methylene blue catalysis

**Table S2.** Comparison of kinetic constant values employed in the catalytic degradation of MB, reported in literature.

|                                           | <i>k</i><br>(10 <sup>-2</sup> s <sup>-1</sup> ) | Reference |
|-------------------------------------------|-------------------------------------------------|-----------|
| AgNPs by <i>Saraca indica</i> Flore       | 2.80                                            | [10]      |
|                                           | 0.74                                            |           |
| Biosynthesized AgNPs                      | 0.25                                            | [11]      |
|                                           | 0.37                                            |           |
| Au@TiO <sub>2</sub> nanocomposites        | 0.26                                            | [12]      |
| AgNPs by <i>Trigonella foenum-graecum</i> | 1.70                                            | [13]      |
|                                           | 1.19                                            |           |
|                                           | 0.81                                            |           |

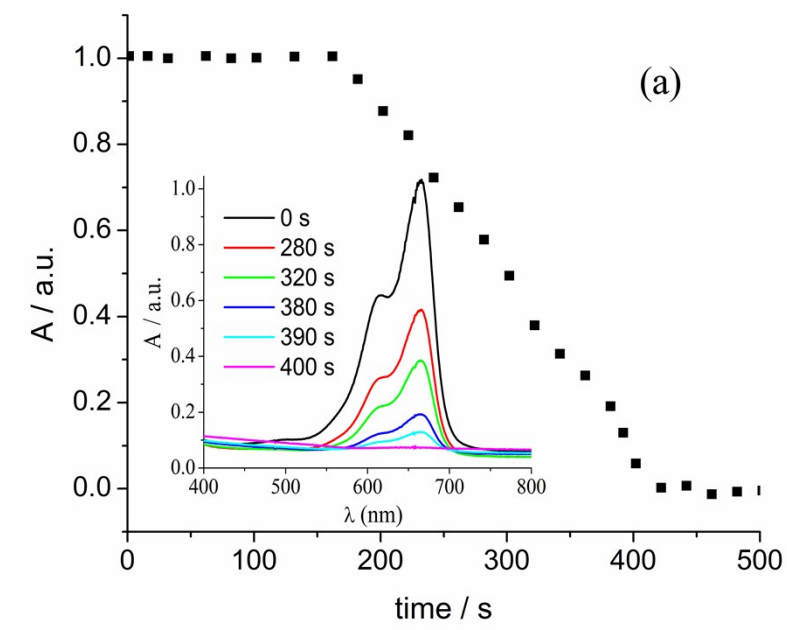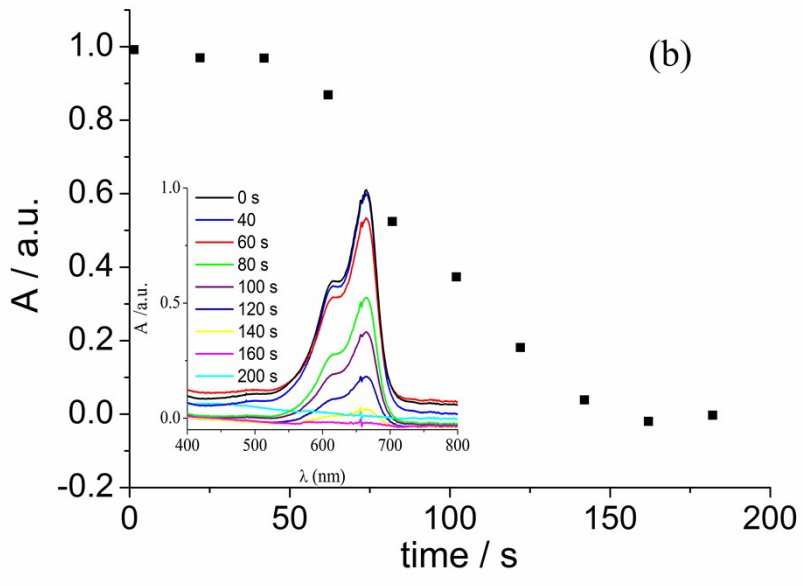

**Figure S5.** Evolution of absorbance at  $\lambda_{\max}$  during the reduction of MB by  $\text{NaBH}_4$  in presence of  $\text{AgNPs}/(\text{SiO}_2\text{-PEI-2})$  at: (a) 1/8/425; (b) 1/8/1700 MB/Ag/ $\text{NaBH}_4$  molar ratio. In the inset: the corresponding plot of A vs  $\lambda$ .

#### 4. UV-Vis spectra of Sunset Yellow (SY) and Azorubine (AZ)

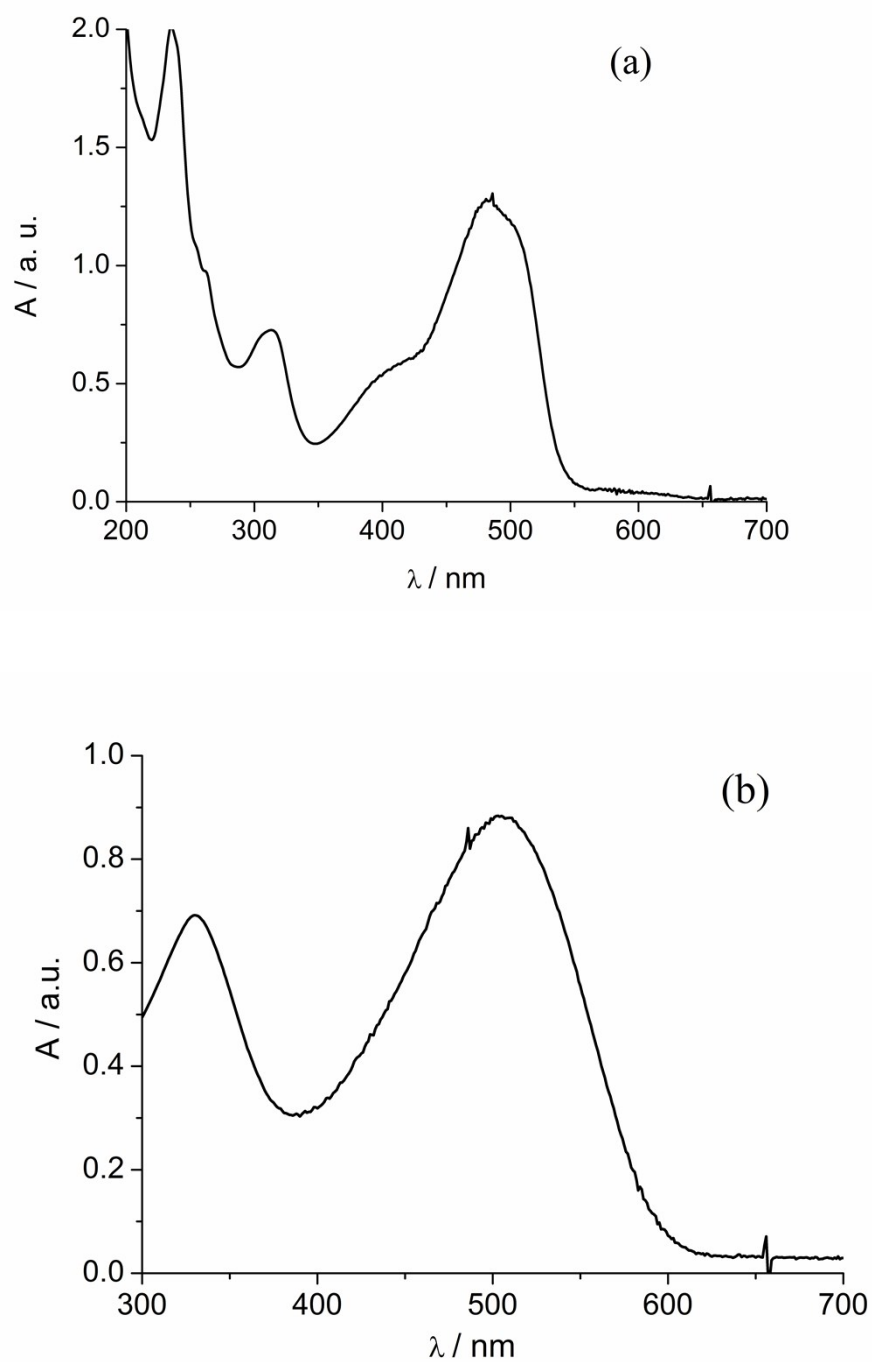

**Figure S6.** UV-Vis spectra of (a) sunset yellow (SY) and (b) azorubine (AZ).

## 5. Catalytic reduction of azo dyes SY and AZ by AgNPs/(SiO<sub>2</sub>-PEI-2)

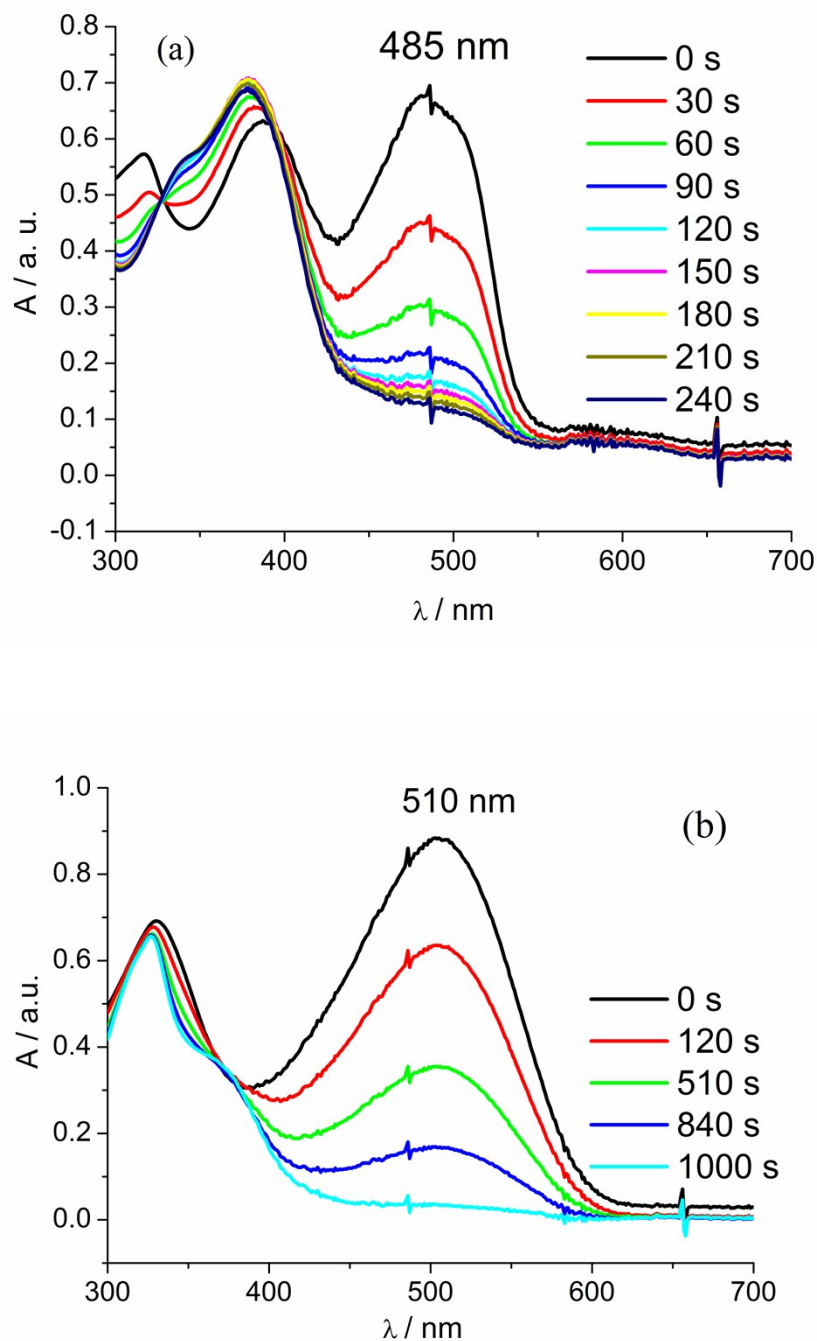

**Figure S7.** Evolution of UV-Vis absorption spectra of (a) SY and (b) AZ by NaBH<sub>4</sub> in presence of AgNPs/(SiO<sub>2</sub>-PEI-2) at 1/4/21 Dye/Ag/NaBH<sub>4</sub> molar ratio.

## 6. SEM analysis

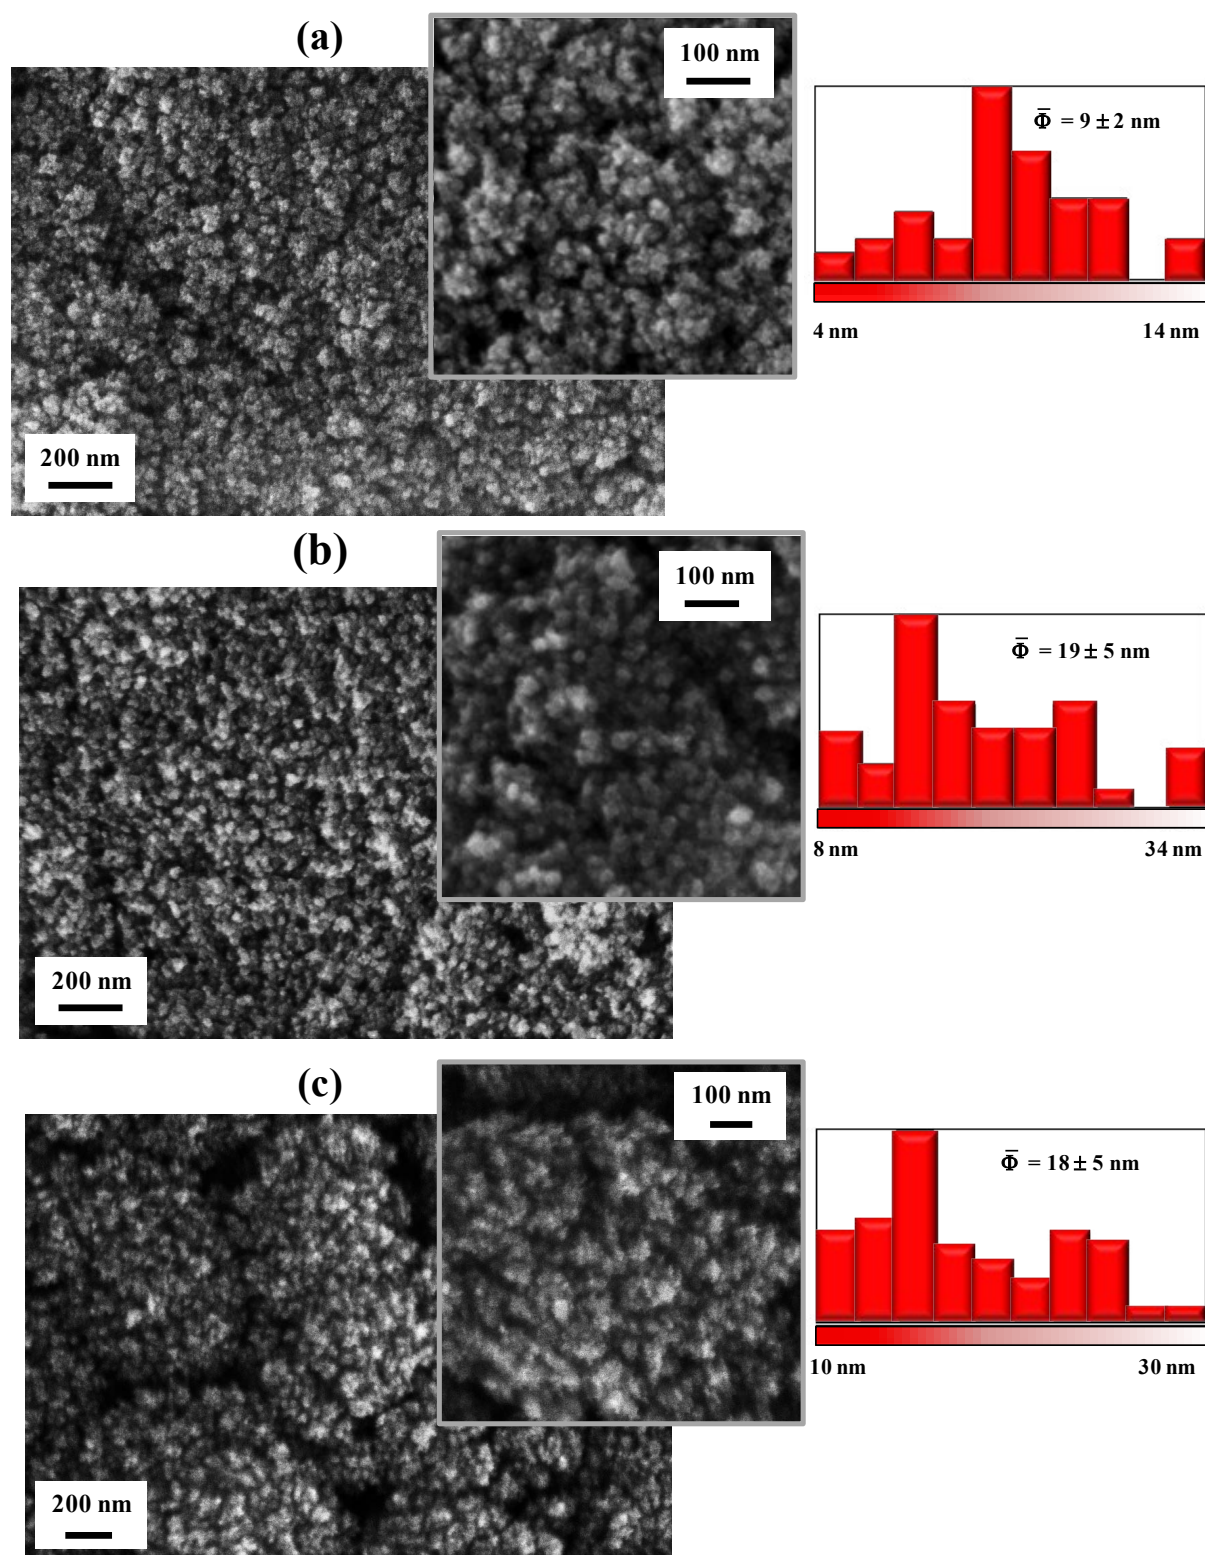

**Figure S8.** FE-SEM images of AgNPs/(SiO<sub>2</sub>-PEI-2): (a) before catalysis; (b) after MB catalysis; (c) after SY catalysis.

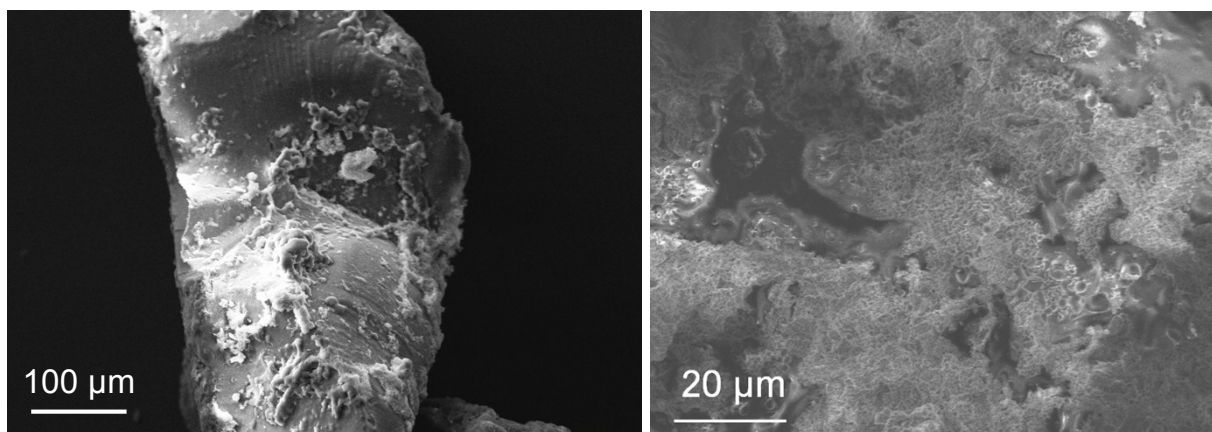

**Figure S9.** SEM images of commercial SiO<sub>2</sub>-PEI at different magnification.

### **7. UV-Vis spectra of MB before and after addition of AgNPs/(SiO<sub>2</sub>-PEI-2)**

In order to evaluate the amount of the adsorbed dyes on AgNPs/(SiO<sub>2</sub>-PEI-2) before the catalytic reaction a comparison of the UV-Vis absorption spectra of a MB solution was made. The UV-Vis spectrum of MB solution was registered before and after 3600 s from the addition of AgNPs/(SiO<sub>2</sub>-PEI-2) (1/12 MB/Ag molar ratio) in absence of NaBH<sub>4</sub>. From the absorbance decrease a value of 10% of adsorbed MB could be estimated.

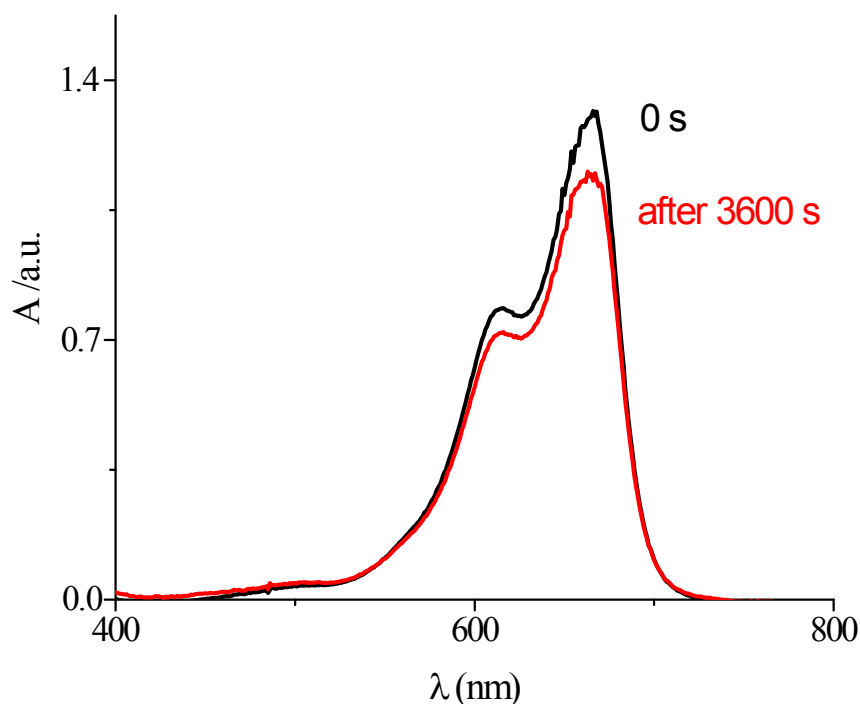

**Figure S10** UV-Vis absorption spectra of a MB solution before and after 3600 s from the addition of AgNPs/(SiO<sub>2</sub>-PEI-2) (1/12 MB/Ag molar ratio) in absence of NaBH<sub>4</sub>.

## References

- [1] <http://srdata.nist.gov/xps>.
- [2] Moulder, J. F.; Stickle, W. F.; Sobol, P. E.; Bomben, K. D. *Handbook of X-ray Photoelectron Spectroscopy*, edited by J. Chastain (Perkin Elmer Corporation, Eden Prairie, MN, 1992).
- [3] Briggs, D.; Seah, M. P. *Practical Surface Analysis by Auger and X-ray Photoelectron Spectroscopy*, J. Wiley & Sons, 1983.
- [4] Barreca, D.; Gasparotto, A.; Maragno, C.; Tondello, E.; Gialanella, S. *J. Appl. Phys.* 2005, **97**, 054311.
- [5] Armelao, L.; Barreca, D.; Bottaro, G.; Gasparotto, A.; Maragno, C.; Tondello, E. *Surface Science Spectra* 2003, **10**, 170.



- [6] Salaita, G. N. ; Hazos, Z. F.; Hoflund, G. B. *J. Electron Spectrosc. Relat. Phenom.* 2000, **107**, 73.
- [7] Armelao, L. ; Barreca, D.; Bottaro, G.; Gasparotto, A.; Maccato, C.; Tondello, E.; Lebedev, O. I.; Turner, S.; Van Tendeloo, G.; Sada, C.; Lavrenčič Štangar, U. *Chem. Phys. Chem.* 2009, **10**, 3249.
- [8] De, G.; Licciulli, A.; Massaro, C.; Tapfer, L.; Catalano, M.; Battaglin, G.; Meneghini, C.; Mazzoldi, P. *J. Non-Cryst. Solids* 1996, **194**, 225.
- [9] Simon, Q.; Barreca, D.; Bekermann, D.; Gasparotto, A.; Maccato, C.; Comini, E.; Gombac, V.; Fornasiero, P.; Lebedev, O.I. ; Turner, S.; Devi, A.; Fischer, R. A.; Van Tendeloo, G. *International Journal of Hydrogen Energy*, 2011, **36**, 15527.
- [10] Vidhu, V. K.; Philip, D. Spectroscopic, microscopic and catalytic properties of silver nanoparticles synthesized using *Saraca indica* flore. *Spectrochimica Acta Part A: Molecular and Biomolecular Spectroscopy* 2014, **117**, 102.
- [11] Suvith, V. S.; Philip, D. Catalytic degradation of methylene blue using biosynthesized gold and silver nanoparticles. *Spectrochimica Acta Part A: Molecular and Biomolecular Spectroscopy* 2014, **118**, 526.
- [12] Khan, M. M.; Lee, J.; Cho, M. H. Au@TiO<sub>2</sub> nanocomposites for the catalytic degradation of methyl orange and methylene blue: An electron relay effect. *Journal of Industrial and Engineering Chemistry* 2014, **20**, 1584.
- [13] Vidhu, V. K.; Philip, D. Catalytic degradation of organic dyes using biosynthesized silver Nanoparticles. *Micron* 2014, **56**, 54.
